# Supplementary material for: A targeted neurotransmitter quantification and nontargeted metabolic profiling method for pharmacometabolomics analysis of olanzapine by using UPLC-HRMS
Source: Royal Society of Chemistry journal article supplement (doi:10.1039/d0ra02406f), 2020-01-01
Supplement: d0ra02406f1.pdf [file d0ra02406f1.pdf]

## Electronic Supporting Information

### **A targeted neurotransmitters quantification and nontargeted metabolic profiling method for pharmacometabolomics analysis of olanzapine by using UPLC-HRMS**

Dan Liu,<sup>†a</sup> Zhuoling An,<sup>†b</sup> Pengfei Li,<sup>b</sup> Yanhua Chen,<sup>a</sup> Ruiping Zhang,<sup>a</sup> Lihong Liu,<sup>\*b</sup> Jiuming He<sup>\*a</sup> and Zeper Abliz<sup>a,c</sup>

<sup>a</sup>State Key Laboratory of Bioactive Substance and Function of Natural Medicines, Institute of Materia Medica, Chinese Academy of Medical Sciences and Peking Union Medical College, Beijing 100050, P. R. China

<sup>b</sup>Pharmacy Department of Beijing Chao-Yang Hospital, Capital Medical University, Beijing 100020, P.R. China

<sup>c</sup>Center for Imaging and Systems Biology, Minzu University of China, Beijing 100081, China

\*Corresponding to [hejiuming@imm.ac.cn](mailto:hejiuming@imm.ac.cn) and [liulihong@bjcyh.com](mailto:liulihong@bjcyh.com)

## CONTENTS

|                                                                                                                                                              |      |
|--------------------------------------------------------------------------------------------------------------------------------------------------------------|------|
| 1. Methods .....                                                                                                                                             | S-3  |
| 1.1 Non-targeted metabolomic analytical and data preprocessing methods .....                                                                                 | S-3  |
| 1.2 Clinical sample collection .....                                                                                                                         | S-4  |
| 1.3 The Method validation procedure .....                                                                                                                    | S-5  |
| 2. Supporting Figures and Tables .....                                                                                                                       | S-7  |
| Fig. S1 The instrumental LC separation system setup .....                                                                                                    | S-7  |
| Fig. S2 The number of features detected by LC- MS .....                                                                                                      | S-7  |
| Fig. S3 The typical XICs of the serotonin obtained from full MS and tSIM .....                                                                               | S-8  |
| Fig. S4 Line plots of quality control (QC) samples.....                                                                                                      | S-8  |
| Fig. S5 PCA score plots and OPLS-DA score plots.....                                                                                                         | S-9  |
| Fig. S6 Metabolic pathways enrichment analysis of potential biomarkers .....                                                                                 | S-9  |
| Table S1 The detailed elution gradient and flow rate.....                                                                                                    | S-10 |
| Table S2 Regression equation, linear range, correlation coefficient .....                                                                                    | S-11 |
| Table S3 Intra -day assay accuracies and precisions of 13 metabolites .....                                                                                  | S-12 |
| Table S4 Inter -day assay accuracies and precisions of 13 metabolites .....                                                                                  | S-13 |
| Table S5 Extraction recoveries of the 13 metabolites. ....                                                                                                   | S-14 |
| Table S6 Freeze-thaw stability of 13 metabolites .....                                                                                                       | S-15 |
| Table S7 Results of stability test under different storage conditions: autosampler<br>stability for 4 °C for 24 h.....                                       | S-16 |
| Table S8 Results of stability test under different storage conditions: autosampler<br>stability for 4 °C for 48 h.....                                       | S-17 |
| Table S9 Information list of differential metabolites in plasma between before taking<br>drug group and after taking drug group identified by LC-MS/MS ..... | S-18 |
| Table S10 Pathway with PI greater than 0.1 analysis of the potential differential<br>metabolite between before and after administration group .....          | S-20 |

## Methods

### 1.1 Non-targeted metabolomic analytical and data preprocessing methods

The parameters for peak finding, filtering, alignment, scaling and identification using R software. (based on data of plasm samples using LC-ESI (+)-MS, for example)

```
rm(list=ls(all=TRUE))
library(Biobase)
library(xcms)
library(multtest)
library(CAMERA)
sessionInfo()
xs<-xcmsSet(profmetho = "binlin",method="centWave",ppm = 2.5,
peakwidth=c(5,35), snthresh =20,prefilter=c(10,5000),integrate=1, mzdiff =0.005)
xs<-group(xs,bw=5,minfrac=0.3,mzwid=0.025)
save(xs,file="xs.Rda")
ret.xs.obiwarp<-retcor(xs,method="obiwarp",plottype="deviation")
ret.xs.obiwarp<-group(ret.xs.obiwarp, bw = 5,minfrac=0.3,mzwid=0.025)
ret.xs.obiwarp
fill.ret.xs.obiwarp<-fillPeaks(ret.xs.obiwarp)
fill.ret.xs.obiwarp
save(fill.ret.xs.obiwarp, file="fill.ret.xs.obiwarp.Rda")
an.C<-
annotate(fill.ret.xs.obiwarp,sigma=6,perfw hm=0.3,cor_eic_th=0.75,maxcharge=3,ma
xiso=3,mzabs=0.03,multiplier=3,polarity="positive/negative")
peaklist.C<-getPeaklist(an.C)
write.csv(peaklist.C,file='annotated.C.csv')
an.M<-
annotate(fill.ret.xs.obiwarp,sigma=6,perfw hm=0.3,cor_eic_th=0.75,maxcharge=3,ma
xiso=3,mzabs=0.03,multiplier=3,polarity="positive/negative ")
peaklist.M<-getPeaklist(an.M)
write.csv(peaklist.M,file='annotated.M.csv')
an.QC<-
annotate(fill.ret.xs.obiwarp,sigma=6,perfw hm=0.3,cor_eic_th=0.75,maxcharge=3,ma
xiso=3,mzabs=0.03,multiplier=3,polarity="positive/negative ")
```

```
peaklist.QC<-getPeaklist(an.QC)
write.csv(peaklist.QC,file='annotated.QC.csv')
report.fill.ret.xs.obiwarp<-
diffreport(fill.ret.xs.obiwarp,"C","M","QC",eicmax=8000,file="POS-after
conversion")
save(report.fill.ret.xs.obiwarp,file="report.fill.ret.xs.obiwarp.Rad")
```

## 1.2 Clinical sample collection

Healthy volunteers took olanzapine orally disintegrating tablets (5 mg/tablet) produced by Changzhou Siyao Pharmaceuticals CO.,LTD. as test preparation, and olanzapine orally disintegrating tablets (5 mg/tablet) produced by Eli Lilly company (5 mg/tablet) as reference preparation. After fasting overnight for at least 10 hours, the subjects began to eat high calorie and high fat meal 30 minutes before administration in the morning of the test day, and finished eating within 30 minutes. They took 5 mg of the test preparation or reference preparation orally 30 minutes after the start of meal. The drug was placed on the surface of the tongue, swallowed after complete disintegration in the mouth, without water. Drinking water was forbidden from 1 h before taking medicine to 1 h after taking medicine, and standard meals were taken after 4 h and 10 h. At the end of the first cycle, the washing period was 14 days, and the second cycle was carried out alternately. Subjects must meet all of the following criteria for inclusion: Healthy subjects over the age of 18 (including the age of 18) were both male and female. Weight: not less than 50 kg for men and 45 kg for women; BMI is within the range of 19-26 kg/m<sup>2</sup> (BMI = weight (kg) / height<sup>2</sup> (M<sup>2</sup>)). Health status: no history of heart, liver, kidney, digestive tract, nervous system, mental disorders and metabolic abnormalities, physical examination, vital signs examination, laboratory examination (blood routine, urine routine, blood biochemistry, coagulation function), 12 lead electrocardiogram, chest X-ray examination results are normal or abnormal without clinical significance. The subjects must have informed consent to the test and signed the written informed consent voluntarily. The subjects were able to communicate well with the researchers and complete the experiment according to the protocol. Subjects can opt out of the clinical trial at any time, and their further treatment will not be affected. Blood samples were collected from each subject in each week period. Before administration (within 30 minutes) and 0.25 h, 0.5 h, 1 h, 2 h, 3 h, 4 h, 5

h, 6 h, 8 h, 12 h, 24 h, 48 h, 72 h, 96 h, 120 h and 144 h, blood samples were collected from forearm vein for about 4 mL, put into heparin lithium anticoagulant tube, centrifuged at 4 °C for 10 min, transferred upper plasma, frozen in refrigerator at - 60 to - 80 °C for preservation and experiment.

### **1.3 Method validation procedure**

The results show that limits of quantification ranged from 1 to 100 000 ng mL<sup>-1</sup>. The method exhibited excellent linear calibration curves for the assay of analytes, which were greater than 0.99. The inter- and intra-day precision and accuracy of analytes were lower than 15%. The recovery rates of analytes are in the range of 71.9~114.8%. The samples of all analytes placed in the autosampler at room temperature for 24 h, and 48 h were stable.

#### **1.3.1 Linearity**

The determination of linearity was evaluated by using 8 calibration concentration levels and calibration curves were established using weighted ( $w = 1/x^2$ ) linear regression analysis. While correlation coefficient ( $r$ ) were served as a standard to linearity, good Linearity with correlation coefficients were 0.99 was considered to be acceptable.

#### **1.3.2 Accuracy and precision**

The intra- and inter-day accuracy and precision of the method were evaluated by analyzing QC samples at three different concentration levels (Low, Medium, High) of mixed standards: QC samples were prepared in six replicates on the same day and three independent days, respectively.

#### **1.3.3 Extraction recovery**

The extraction recovery was determined at three concentrations levels (low, medium and high) by calculated from the ratio of peak area  $(A/B) \times 100\%$  obtained by two different sample processing methods at each concentration. A and B are mean at the same concentration of analytes in samples, A obtained from spiked before homogenization and extraction, B obtained from spiked after homogenization and extraction, and then prepare 6 samples in parallel for each concentration.

#### **1.3.4 Stability studies**

Stability study tested six replicates of QC samples at three concentration levels (low, medium and high) under various conditions, including freeze-thaw stability and

autosampler stability. Freeze–thaw stability was assessed QC samples after three freeze-thaw cycles from  $-80\text{ }^{\circ}\text{C}$  to room temperature; Autosampler stability was investigated QC samples placed in the autosampler at  $4\text{ }^{\circ}\text{C}$  temperature for 24 h, and 48 h and then analyzed immediately by LC-MS.

#### 1.3.5. Validation for non-targeted metabolomics

For non-targeted metabolomics analysis, to control data quality and obtain reliable data from metabolomics analysis, we were used QC samples to monitor the stability of the system and appraise data quality. The data matrix obtained by LC - (+) ESI-MS and (-) ESI-MS analysis of QC samples was analyzed by PCA. The projection results of each sample on the first principal component are shown in Supporting Information Fig. S5A, B. It can be seen from the figure that the relative deviations of the peak areas of QC samples are controlled within the 2 SD range. The results show that the stability of the analysis system is good during the mass analysis. Additionally, unsupervised principal component analysis (PCA) was performed based on all samples. All QC samples during batch analysis were clustered in the center of the PCA scores plot, also indicating that the stability of the analysis system is good. Results showed in Fig. S5 A and B.

## Figures and Tables

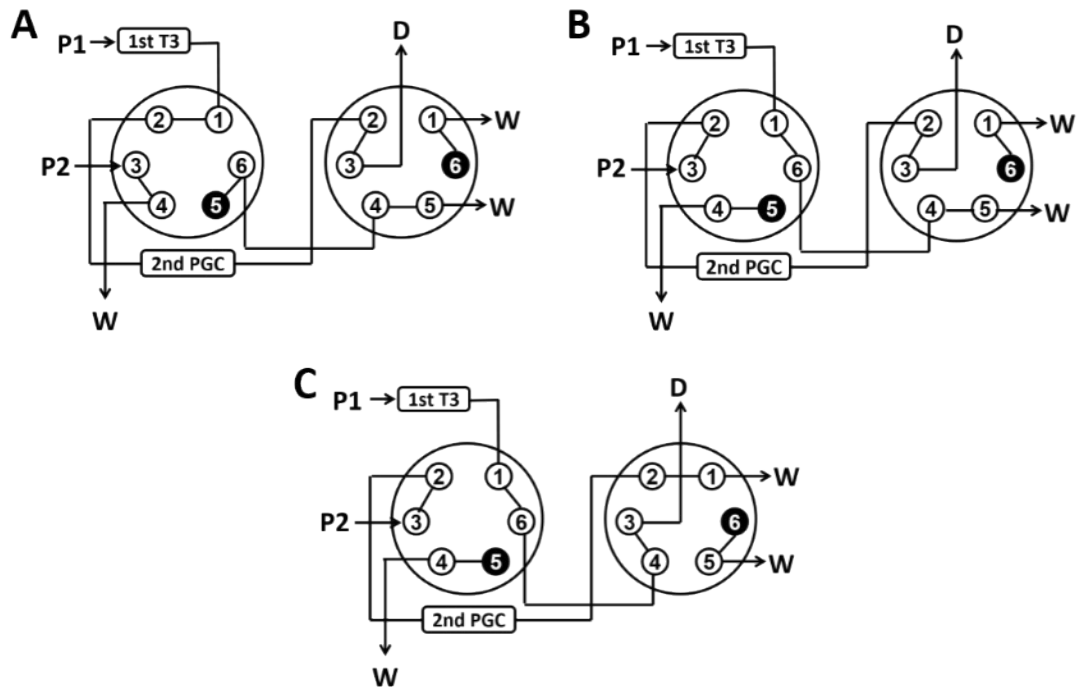

Fig. S1 The instrumental LC separation system setup (P: pump, D: detector, W: waste)

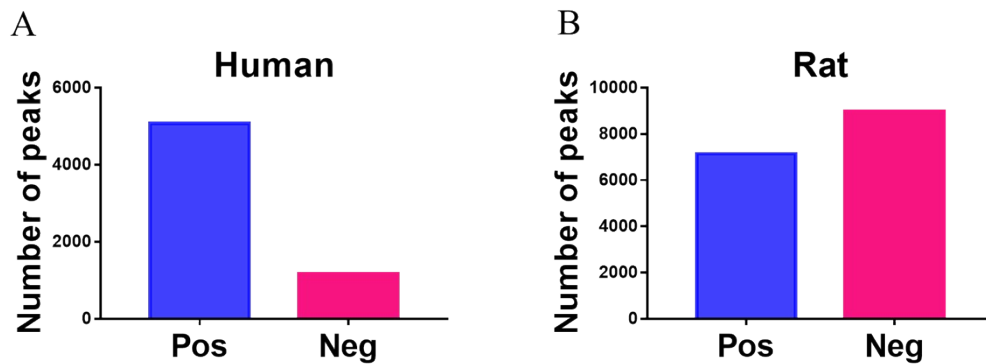

Fig. S2 A, B. Number of features detected by LC- (+/-) ESI- MS using different mobile phase gradient from human and rat sample.

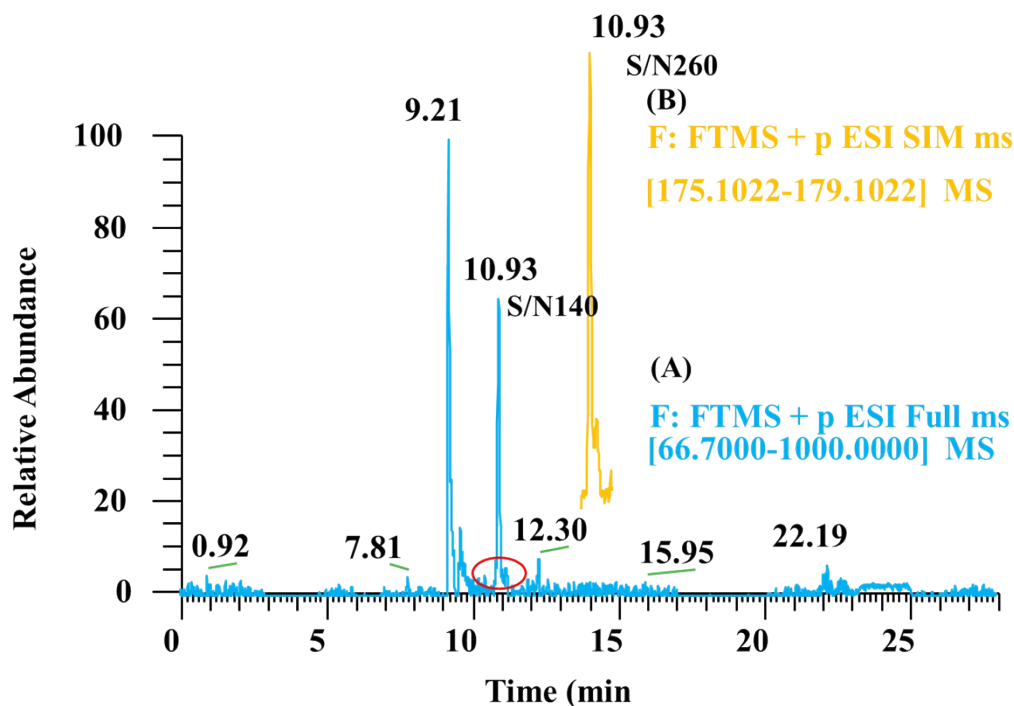

**Fig. S3** The typical XICs of the serotonin obtained from full MS scan (A) and from tSIM (B)

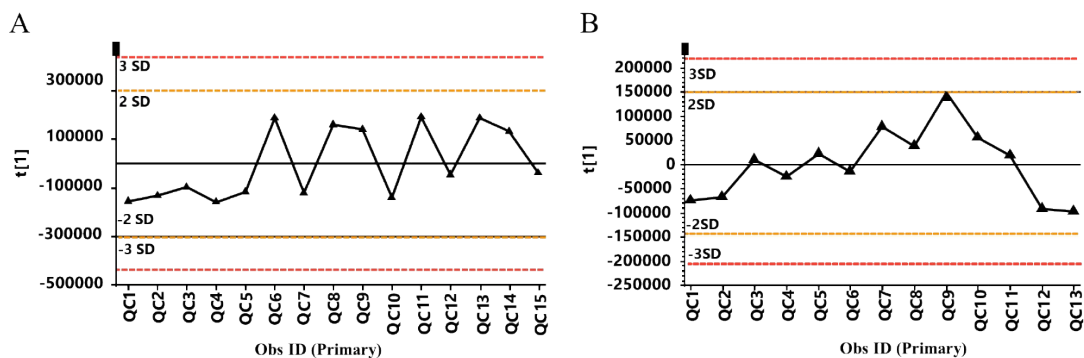

**Fig. S4** A, B, Line plots of quality control (QC) samples generated by PCA using component 1 and 2. Peak area deviation could be evaluated by distribution of the runs. X-axis: run order; Y-axis: standard deviation. (A) QC plot for the first and second component from LC- (+) ESI-MS data; (B) from LC- (-) ESI-MS data.



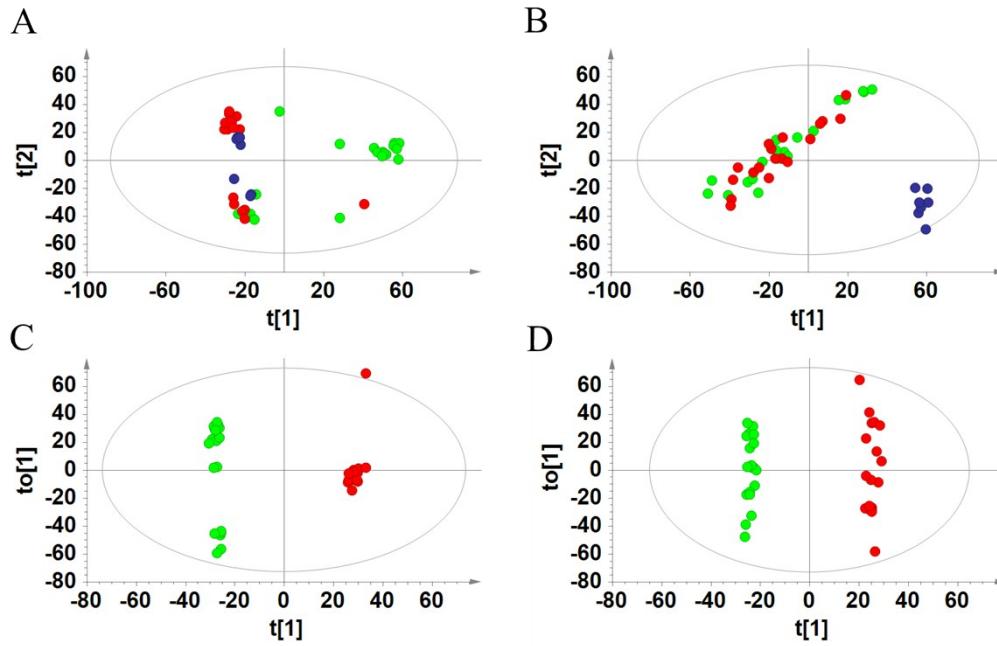

**Fig. S5** PCA score plots based on the data from (A) LC-(+)ESI-MS, (B) LC-(-)ESI-MS. (●: before taking drug group ; ●: after taking drug group; ●:QC samples ). OPLS-DA score plots based on the data from (C) LC-(+)ESI-MS, (D) LC-(-)ESI-MS.

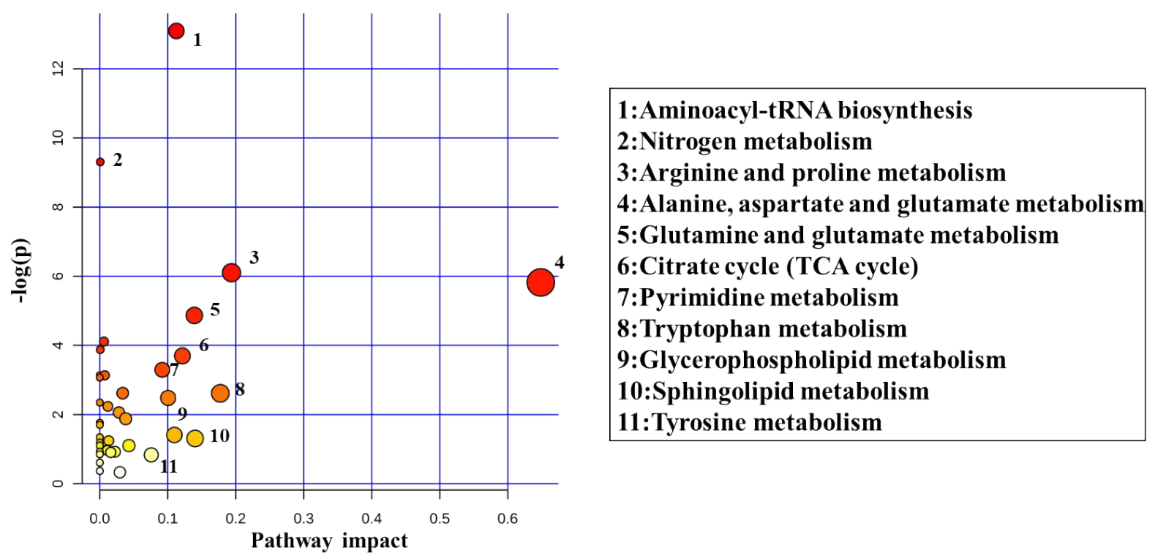

**Fig. S6** Metabolic pathways enrichment analysis of potential biomarkers.

**Table S1.** The detailed elution gradient and flow rate

| Time (min) | First dimension       |                      | Second dimension      |                                   | Valve position |
|------------|-----------------------|----------------------|-----------------------|-----------------------------------|----------------|
|            | Flow rate<br>(mL/min) | Gradient<br>ACN (v%) | Flow rate<br>(mL/min) | Gradient<br>ACN (v%)              |                |
| 0-2.5      | 0.18                  | 2%                   | 0                     | /                                 | A              |
| 2.5-8.5    | 0                     | /                    | 0.2                   | 2%                                | B              |
|            |                       | 8.5-15 min, 2-70%    |                       | 8.5-18 min, 2%-100% (washing)     |                |
| 8.5-20     | 0.25                  | 15-20 min, 70-100%   | 0.25                  | 18-27 min, 2% (pre-equilibration) | C □            |
| 20-28      | 0.18                  | 2%                   |                       |                                   |                |

**Table S2.** Regression equation, linear range, correlation coefficient of the detection of 13 metabolites

| NO | Compound   | Formula                                                       | <i>m/z</i> | IS                       | Linear equation of calibration curves | R      | liner range(ng mL <sup>-1</sup> ) |
|----|------------|---------------------------------------------------------------|------------|--------------------------|---------------------------------------|--------|-----------------------------------|
| 1  | Trp        | C <sub>11</sub> H <sub>12</sub> N <sub>2</sub> O <sub>2</sub> | 205.0972   | Trp-d <sub>5</sub>       | Y = -0.00345422+0.000125887*X         | 0.9966 | 100-20000                         |
| 2  | 5-HTP      | C <sub>11</sub> H <sub>12</sub> N <sub>2</sub> O <sub>3</sub> | 221.0921   | Trp-d <sub>5</sub>       | Y = -7.67882e-006+3.20041e-005*X      | 0.9915 | 1-200                             |
| 3  | 5-HT       | C <sub>10</sub> H <sub>12</sub> N <sub>2</sub> O              | 177.1022   | 5-HT-d <sub>4</sub>      | Y = -0.00215224+0.000583969*X         | 0.9927 | 20-4000                           |
| 4  | 5-HIAA     | C <sub>10</sub> H <sub>9</sub> NO <sub>3</sub>                | 192.0655   | IAA-d <sub>2</sub>       | Y = 0.000188532+0.00271059*X          | 0.998  | 2-400                             |
| 5  | Kynurenine | C <sub>10</sub> H <sub>12</sub> N <sub>2</sub> O <sub>3</sub> | 209.0921   | IAA-d <sub>2</sub>       | Y = -2.52919+0.310782*X               | 0.9928 | 10-2000                           |
| 6  | Tyr        | C <sub>9</sub> H <sub>11</sub> NO <sub>3</sub>                | 182.0812   | Tyr-d <sub>2</sub>       | Y = 0.000828546+0.000537593*X         | 0.9987 | 200-40000                         |
| 7  | L-DOPA     | C <sub>9</sub> H <sub>11</sub> NO <sub>4</sub>                | 198.0761   | Tyr-d <sub>2</sub>       | Y = -1.56258e-005+3.84442e-006*X      | 0.9982 | 20-4000                           |
| 8  | Glu        | C <sub>5</sub> H <sub>9</sub> NO <sub>4</sub>                 | 148.0604   | Glu-d <sub>5</sub>       | Y = 0.656039+0.00452585*X             | 0.9967 | 500-100000                        |
| 9  | Gln        | C <sub>5</sub> H <sub>10</sub> N <sub>2</sub> O <sub>3</sub>  | 147.0764   | Gln- <sup>15</sup> N     | Y = 0.447101+0.00354935*X             | 0.9925 | 200-40000                         |
| 10 | GABA       | C <sub>4</sub> H <sub>9</sub> NO <sub>2</sub>                 | 104.0706   | GABA-d <sub>2</sub>      | Y = 0.102702+0.00399208*X             | 0.9961 | 100-20000                         |
| 11 | Ach        | C <sub>7</sub> H <sub>16</sub> NO <sub>2</sub>                | 146.1176   | Choline-d <sub>9</sub>   | Y = 0.0639203+0.0107657*X             | 0.9961 | 20-4000                           |
| 12 | Asn        | C <sub>4</sub> H <sub>8</sub> N <sub>2</sub> O <sub>3</sub>   | 133.0608   | Asn-d <sub>1</sub>       | Y = 0.00420051+0.00213585*X           | 0.9985 | 40-8000                           |
| 13 | Taurine    | C <sub>2</sub> H <sub>7</sub> NO <sub>3</sub> S               | 126.0219   | Taurine- <sup>15</sup> N | Y = 0.227581+0.00972572*X             | 0.9981 | 100-20000                         |

**Table S3.** Intra -day assay accuracies and precisions of the detection 13 metabolites

| NO | Compound   | Low         |              | Medium      |              | High        |              |
|----|------------|-------------|--------------|-------------|--------------|-------------|--------------|
|    |            | Accuracy(%) | Precision(%) | Accuracy(%) | Precision(%) | Accuracy(%) | Precision(%) |
| 1  | GABA       | 101.4       | 0.9          | 101.3       | 0.3          | 98.1        | 4.1          |
| 2  | Ach        | 108.9       | 5.2          | 108.1       | 1.8          | 99.9        | 7.1          |
| 3  | Asn        | 88.9        | 3.4          | 100.7       | 4.7          | 103.5       | 5.2          |
| 4  | Taurine    | 90.8        | 3.1          | 99.4        | 3.4          | 107.8       | 1.3          |
| 5  | Gln        | 106.4       | 1.3          | 111.4       | 1.9          | 96.8        | 4            |
| 6  | Glu        | 102.9       | 4.8          | 107.3       | 1.2          | 98.3        | 5.6          |
| 7  | L-DOPA     | 108.9       | 3.5          | 110.7       | 2.3          | 112.7       | 0.6          |
| 8  | Tyr        | 96.7        | 3.7          | 104.6       | 2.2          | 105.8       | 1.3          |
| 9  | 5-HT       | 90.3        | 3.1          | 89          | 1.7          | 98.8        | 8.8          |
| 10 | 5-HTP      | 93.6        | 2.4          | 98.2        | 4.8          | 109.1       | 2.5          |
| 11 | kynurenine | 106.6       | 2.8          | 107.8       | 2.1          | 107.3       | 3.4          |
| 12 | Trp        | 92.6        | 2.9          | 89.8        | 2.6          | 100.9       | 6.2          |
| 13 | 5-HIAA     | 106.4       | 4.4          | 106.9       | 3.5          | 95.7        | 4.7          |

**Table S4.** Inter-day assay accuracies and precisions of 13metabolites

| NO | Compound   | Low         |              | Medium      |              | High        |              |
|----|------------|-------------|--------------|-------------|--------------|-------------|--------------|
|    |            | Accuracy(%) | Precision(%) | Accuracy(%) | Precision(%) | Accuracy(%) | Precision(%) |
| 1  | GABA       | 103.2       | 5.4          | 104.4       | 2.8          | 96.1        | 6.6          |
| 2  | Ach        | 108.3       | 4.5          | 104.8       | 5.8          | 100.6       | 10.2         |
| 3  | Asn        | 96.1        | 9.5          | 105.8       | 6.1          | 105.9       | 4.9          |
| 4  | Taurine    | 89.4        | 2.8          | 98.1        | 6.5          | 105.3       | 5.8          |
| 5  | Gln        | 110.5       | 3            | 112.2       | 1.7          | 92.4        | 4.7          |
| 6  | Glu        | 100.9       | 7.2          | 103.5       | 5.5          | 93.9        | 5.3          |
| 7  | L-DOPA     | 99.8        | 10.8         | 106.2       | 8.9          | 108.9       | 4.8          |
| 8  | Tyr        | 102.4       | 6.2          | 104.3       | 4.9          | 106.5       | 3.5          |
| 9  | 5-HT       | 95.9        | 9.2          | 102.6       | 10.1         | 101.3       | 8.2          |
| 10 | 5-HTP      | 91          | 4.1          | 94.8        | 7.5          | 107.9       | 5.9          |
| 11 | kynurenine | 99.1        | 9.4          | 104.93      | 8.6          | 107.8       | 4.9          |
| 12 | Trp        | 98.5        | 6.6          | 99.8        | 8.6          | 106.7       | 5.9          |
| 13 | 5-HIAA     | 100.9       | 6.7          | 98.3        | 8.4          | 98.5        | 7.1          |

**Table S5.** Extraction recoveries for the detection of the 13 metabolites.

| NO | Compound   | Low                    |              | Medium                 |              | High                   |              |
|----|------------|------------------------|--------------|------------------------|--------------|------------------------|--------------|
|    |            | Extraction Recovery(%) | Precision(%) | Extraction Recovery(%) | Precision(%) | Extraction Recovery(%) | Precision(%) |
| 1  | GABA       | 72.9                   | 1.2          | 77.9                   | 6.6          | 75.1                   | 7.8          |
| 2  | Ach        | 94.7                   | 5.4          | 92.9                   | 5.6          | 86.7                   | 5.2          |
| 3  | Asn        | 71.9                   | 6.4          | 89.4                   | 2.3          | 79.3                   | 2.7          |
| 4  | Taurine    | 90.3                   | 4.5          | 88.9                   | 5.7          | 91.7                   | 8.9          |
| 5  | Gln        | 72.6                   | 4.7          | 73.9                   | 8.2          | 79.4                   | 4.3          |
| 6  | Glu        | 76                     | 3            | 82.8                   | 8.8          | 88.1                   | 9.7          |
| 7  | L-DOPA     | 97.1                   | 7.8          | 107.8                  | 3.6          | 114.7                  | 3.1          |
| 8  | Tyr        | 101.2                  | 3.9          | 103.4                  | 4.8          | 113.7                  | 6.5          |
| 9  | 5-HT       | 114.9                  | 4.6          | 114.5                  | 11.1         | 100.3                  | 5.4          |
| 10 | 5-HTP      | 77.9                   | 2.1          | 74.1                   | 2.6          | 88.5                   | 7.1          |
| 11 | kynurenine | 72.4                   | 5.8          | 74.9                   | 0.6          | 72.7                   | 6.7          |
| 12 | Trp        | 74.2                   | 4.2          | 79.2                   | 5.3          | 84.1                   | 9.2          |
| 13 | 5-HIAA     | 73.4                   | 3.3          | 74.4                   | 2.9          | 77.2                   | 11.9         |

**Table S6.** Freeze-thaw stability of the detection 13metabolites

| NO | Compound   | Freeze-thaw |              | Freeze-thaw |              | Freeze-thaw |              |
|----|------------|-------------|--------------|-------------|--------------|-------------|--------------|
|    |            | Low         | Medium       | High        |              |             |              |
|    |            | Accuracy(%) | Precision(%) | Accuracy(%) | Precision(%) | Accuracy(%) | Precision(%) |
| 1  | GABA       | 92.2        | 3.8          | 95.8        | 2.6          | 92.9        | 1.9          |
| 2  | Ach        | 92.8        | 3.7          | 93.3        | 2.7          | 89.1        | 4.4          |
| 3  | Asn        | 90.6        | 3.5          | 96          | 4.2          | 95.7        | 1.8          |
| 4  | Taurine    | 98.7        | 6.2          | 95.6        | 3.6          | 90.9        | 4.98         |
| 5  | Gln        | 101.9       | 1.37         | 103.6       | 2.4          | 94.6        | 3.88         |
| 6  | Glu        | 95.7        | 2.97         | 91.2        | 2.9          | 98.9        | 3.28         |
| 7  | L-DOPA     | 98.8        | 4.77         | 101.6       | 2.9          | 104.5       | 3.98         |
| 8  | Tyr        | 91.3        | 4.97         | 89.9        | 2.2          | 101.6       | 3.7          |
| 9  | 5-HT       | 91.2        | 5.4          | 95.9        | 1.7          | 95.4        | 6.6          |
| 10 | 5-HTP      | 100.2       | 4.6          | 98.7        | 1.9          | 92.5        | 3.2          |
| 11 | kynurenine | 95.5        | 11.47        | 96.2        | 3.9          | 90.3        | 2            |
| 12 | Trp        | 90.8        | 2.4          | 91.8        | 2.8          | 98.1        | 2.9          |
| 13 | 5-HIAA     | 101.3       | 3.8          | 103.5       | 1.8          | 102.1       | 1.2          |

**Table S7.** Results of stability test under different storage conditions: autosampler stability for 4 °C for 24 h

| NO | Compound   | 4°C for 24h |              | 4°C for 24h |              | 4°C for 24h |              |
|----|------------|-------------|--------------|-------------|--------------|-------------|--------------|
|    |            | Low         | Medium       | High        | High         | High        |              |
|    |            | Accuracy(%) | Precision(%) | Accuracy(%) | Precision(%) | Accuracy(%) | Precision(%) |
| 1  | GABA       | 102.9       | 2.1          | 102.7       | 1.2          | 100.3       | 0.6          |
| 2  | Ach        | 107.9       | 2.9          | 101.8       | 0.5          | 92.9        | 6.2          |
| 3  | Asn        | 99.5        | 7.6          | 104.8       | 3.6          | 94.3        | 5.2          |
| 4  | Taurine    | 102         | 1.9          | 101.2       | 2.8          | 100.7       | 5.6          |
| 5  | Gln        | 101.6       | 1.5          | 102.9       | 1.5          | 93.5        | 2.5          |
| 6  | Glu        | 103.7       | 4.1          | 104.6       | 1.4          | 102.9       | 2.9          |
| 7  | L-DOPA     | 105.3       | 3.9          | 101.7       | 0.9          | 106.7       | 1.5          |
| 8  | Tyr        | 99.7        | 7.9          | 107.3       | 3.2          | 101.2       | 5.7          |
| 9  | 5-HT       | 105.8       | 2.6          | 109.1       | 3.7          | 96.9        | 8.4          |
| 10 | 5-HTP      | 90          | 3.3          | 96.6        | 8.2          | 102.2       | 2.8          |
| 11 | kynurenine | 102.4       | 5.6          | 107.5       | 6.5          | 107.7       | 2.4          |
| 12 | Trp        | 99.9        | 6.9          | 95          | 3.2          | 96.4        | 6.4          |
| 13 | 5-HIAA     | 107.2       | 4.1          | 104.9       | 7.4          | 101.2       | 2.2          |



**Table S8.** Results of stability test under different storage conditions: autosampler stability for 4 °C for 48 h

| NO | Compound   | 4°C for 48h |              | 4°C for 48h |              | 4°C for 48h |              |
|----|------------|-------------|--------------|-------------|--------------|-------------|--------------|
|    |            | Low         | Medium       | High        | High         | High        |              |
|    |            | Accuracy(%) | Precision(%) | Accuracy(%) | Precision(%) | Accuracy(%) | Precision(%) |
| 1  | GABA       | 101.9       | 5.1          | 103.2       | 1.6          | 93.8        | 2.7          |
| 2  | Ach        | 99.3        | 7.3          | 98.3        | 3.7          | 91.2        | 3.9          |
| 3  | Asn        | 98          | 5.5          | 99.4        | 3.4          | 92.9        | 2.6          |
| 4  | Taurine    | 104.2       | 1.6          | 95          | 2.5          | 94.2        | 3.4          |
| 5  | Gln        | 102.7       | 1.8          | 102.5       | 1.8          | 107.6       | 3.8          |
| 6  | Glu        | 101.3       | 7.5          | 101.9       | 5            | 95.5        | 4.6          |
| 7  | L-DOPA     | 99.9        | 7.7          | 101.4       | 1.8          | 104.6       | 5.3          |
| 8  | Tyr        | 99.8        | 5.2          | 96.2        | 3.8          | 99.6        | 3.7          |
| 9  | 5-HT       | 101         | 3.1          | 102.9       | 3.9          | 90.8        | 11.3         |
| 10 | 5-HTP      | 89.7        | 2.2          | 95.9        | 8.5          | 95.6        | 8.2          |
| 11 | kynurenine | 89.8        | 4.4          | 94.9        | 7            | 89.4        | 5.1          |
| 12 | Trp        | 95.8        | 6.8          | 99.2        | 3.8          | 101.9       | 7.9          |
| 13 | 5-HIAA     | 104.2       | 3.2          | 104.3       | 3.7          | 102.6       | 2.3          |

**Table S9.** Information list of differential metabolites in plasma between before taking drug group and after taking drug group identified by LC-MS/MS

| Name                       | Formula                                                       | Precursor Ion (m/z) | MS error (ppm) | Product Ion (m/z)                                            | RT (min) | FC   |
|----------------------------|---------------------------------------------------------------|---------------------|----------------|--------------------------------------------------------------|----------|------|
| 1-Methylhistidine          | C <sub>7</sub> H <sub>11</sub> N <sub>3</sub> O <sub>2</sub>  | 170.0919            | -2.94          | 68.0501;97.0766;107.0795;109.0726;110.0795;124.0869;126.1025 | 4.27     | 2.69 |
| LysoPE(0:0/18:2)           | C <sub>23</sub> H <sub>44</sub> NO <sub>7</sub> P             | 478.2911            | -3.55          | 216.0626;263.2363;337.2727;460.2823                          | 17.54    | 2.58 |
| PC(14:0/20:2)              | C <sub>42</sub> H <sub>80</sub> NO <sub>8</sub> P             | 758.5665            | -3.82          | 63.2733;184.0733                                             | 18.11    | 1.69 |
| L-Tyrosine                 | C <sub>9</sub> H <sub>11</sub> NO <sub>3</sub>                | 182.0809            | -1.65          | 107.0495;118.0651;119.0491;136.0755;147.0438;165.0544        | 9.12     | 1.62 |
| L-Arginine                 | C <sub>6</sub> H <sub>14</sub> N <sub>4</sub> O <sub>2</sub>  | 175.1186            | -2.28          | 60.0564;70.0657;116.0706                                     | 4.24     | 1.61 |
| L-Leucine                  | C <sub>6</sub> H <sub>13</sub> NO <sub>2</sub>                | 132.1018            | -0.76          | 55.0542;56.0502;69.0706;72.0808                              | 9.45     | 1.57 |
| 4-Hydroxycinnamic Acid     | C <sub>9</sub> H <sub>8</sub> O <sub>3</sub>                  | 165.0542            | -2.42          | 53.0395;91.0545;95.0494;103.0543;119.049;123.0439;147.04737  | 9.12     | 1.55 |
| Creatine                   | C <sub>4</sub> H <sub>9</sub> N <sub>3</sub> O <sub>2</sub>   | 132.0765            | -2.27          | 87.0556;90.0552;114.0661                                     | 6.11     | 1.49 |
| L-Methionine               | C <sub>5</sub> H <sub>11</sub> NO <sub>2</sub> S              | 150.058             | -2             | 56.0502;61.0113;74.0236;102.055;104.0529                     | 5.75     | 1.31 |
| L-Acetylcarnitine          | C <sub>9</sub> H <sub>17</sub> NO <sub>4</sub>                | 204.1223            | -3.43          | 60.0815;85.0287;145.0491                                     | 5.5      | 0.68 |
| Linoleyl carnitine         | C <sub>25</sub> H <sub>45</sub> NO <sub>4</sub>               | 424.3404            | -6.83          | 85.0287;144.0106;245.2251                                    | 17.12    | 0.67 |
| Sphinganine                | C <sub>18</sub> H <sub>39</sub> NO <sub>2</sub>               | 302.3042            | -3.97          | 266.2843;284.2936                                            | 16.56    | 0.59 |
| Uracil                     | C <sub>4</sub> H <sub>4</sub> N <sub>2</sub> O <sub>2</sub>   | 113.1345            | -0.88          | 70.0293;98.0081                                              | 9.05     | 0.52 |
| Cortisol                   | C <sub>21</sub> H <sub>30</sub> O <sub>5</sub>                | 363.2151            | -4.13          | 121.0647;267.1734;285.1337;309.184;327.1955;345.2026         | 14.97    | 0.24 |
| Tryptophan                 | C <sub>11</sub> H <sub>12</sub> N <sub>2</sub> O <sub>2</sub> | 205.0964            | -3.9           | 74.0244;132.081;146.0602;159.0918;188.0708                   | 12.53    | 1.08 |
| 5-hydroxytryptophan        | C <sub>11</sub> H <sub>12</sub> N <sub>2</sub> O <sub>3</sub> | 221.0917            | -2.71          | 74.0245;94.0657;146.0603;158.0603;175.0869                   | 12.53    | 1.02 |
| 5-hydroxytryptamine        | C <sub>10</sub> H <sub>12</sub> N <sub>2</sub> O              | 177.1016            | 3.95           | 73.0292;115.0542;132.0807;148.0763;160.0756                  | 11.18    | 0.84 |
| 5-Hydroxyindoleacetic acid | C <sub>10</sub> H <sub>9</sub> NO <sub>3</sub>                | 192.0682            | -2.08          | 94.0608;104.0500;132.0446;146.0601;162.0511;174.0552         | 11.39    | 0.95 |
| L-Dopa                     | C <sub>9</sub> H <sub>11</sub> NO <sub>4</sub>                | 198.0751            | 2.02           | 74.0972;100.0762;157.0835;170.0807                           | 9        | 1.91 |

|                        |                                                               |          |       |                                                       |       |      |
|------------------------|---------------------------------------------------------------|----------|-------|-------------------------------------------------------|-------|------|
| Glutamate              | C <sub>5</sub> H <sub>9</sub> NO <sub>4</sub>                 | 148.0691 | -2.03 | 56.0503;74.0971;84.045;88.0398;102.0553;130.0500      | 3.98  | 1.29 |
| Glutamine              | C <sub>5</sub> H <sub>10</sub> N <sub>2</sub> O <sub>3</sub>  | 147.0759 | -3.4  | 56.0502;74.0971;84.0449;86.0492;101.0713;130.0499     | 3.8   | 1.49 |
| Aspartic acid          | C <sub>4</sub> H <sub>7</sub> NO <sub>4</sub>                 | 134.0444 | -2.98 | 60.0452;86.079;88.0398;105.0701                       | 3.81  | 0.17 |
| Acetylcholine          | C <sub>7</sub> H <sub>16</sub> NO <sub>2</sub>                | 146.1171 | -3.42 | 60.0817;84.0451;87.0447;102.0554;130.0510             | 3.86  | 1.04 |
| LysoPE(18:1/0:0)       | C <sub>23</sub> H <sub>46</sub> NO <sub>7</sub> P             | 478.2936 | 1.67  | 78.9574;140.0106;196.0373;214.0481                    | 17.98 | 3.65 |
| LysoPE(14:0/0:0)       | C <sub>19</sub> H <sub>40</sub> NO <sub>7</sub> P             | 424.2462 | 0.71  | 196.0375;227.2011                                     | 17.16 | 2.95 |
| Galactosylglycerol     | C <sub>9</sub> H <sub>18</sub> O <sub>8</sub>                 | 253.0932 | 5.53  | 61.029;71.0122;89.0227;103.0395;161.0447              | 7.74  | 2.99 |
| LysoPE(0:0/18:3)       | C <sub>23</sub> H <sub>42</sub> NO <sub>7</sub> P             | 474.2626 | 2.32  | 78.9575;140.0109;196.0375;214.0486;277.2175           | 17.25 | 2.79 |
| Octadecanedioic acid   | C <sub>18</sub> H <sub>34</sub> O <sub>4</sub>                | 313.2386 | 4.15  | 99.0800;113.0957;183.1381;277.2174;295.2276           | 17.27 | 2.73 |
| Ferulic acid 4-sulfate | C <sub>10</sub> H <sub>10</sub> O <sub>7</sub> S              | 273.0072 | 3.3   | 149.0597;193.0499                                     | 13.03 | 2.4  |
| Histidinyl-Tryptophan  | C <sub>17</sub> H <sub>19</sub> N <sub>5</sub> O <sub>3</sub> | 340.1418 | 4.12  | 74.0248;108.0552;153.0772;203.0818                    | 11.98 | 2.03 |
| Glutamyltryptophan     | C <sub>16</sub> H <sub>19</sub> N <sub>3</sub> O <sub>5</sub> | 332.1255 | 4.22  | 128.0341;159.0765;185.0561;203.0821;244.1445;288.1361 | 12.5  | 2.09 |
| Citric acid            | C <sub>6</sub> H <sub>8</sub> O <sub>7</sub>                  | 191.0191 | 2.62  | 85.0280;87.0073;111.0074;129.0181;173.0083            | 8.63  | 1.91 |
| LysoPE(0:0/22:5)       | C <sub>27</sub> H <sub>46</sub> NO <sub>7</sub> P             | 526.2947 | 3.61  | 78.9571;196.0376;285.2586;329.2491                    | 17.83 | 1.93 |
| LysoPE(0:0/16:1)       | C <sub>21</sub> H <sub>42</sub> NO <sub>7</sub> P             | 450.2633 | 4.00  | 78.9573;152.9949;196.0376;253.2173;405.2939           | 17.36 | 1.92 |
| Isocitric acid         | C <sub>6</sub> H <sub>8</sub> O <sub>7</sub>                  | 191.0191 | 2.62  | 85.0281;103.0385;111.0073;129.0181;147.029;154.9976   | 11.2  | 1.91 |
| LysoPE(0:0/20:3)       | C <sub>25</sub> H <sub>46</sub> NO <sub>7</sub> P             | 502.2959 | 6.17  | 78.9575;140.0107;196.0374;214.0489;305.2491           | 17.78 | 1.78 |
| Calendic acid          | C <sub>18</sub> H <sub>30</sub> O <sub>2</sub>                | 277.2174 | 4.33  | 59.0123;83.0486;205.19858;259.2068                    | 18.74 | 1.71 |
| LysoPE(18:0/0:0)       | C <sub>23</sub> H <sub>48</sub> NO <sub>7</sub> P             | 480.3091 | 1.25  | 78.9574;140.0105;196.0373;214.0479;283.2642           | 18.6  | 1.56 |
| LysoPE(0:0/16:0)       | C <sub>21</sub> H <sub>44</sub> NO <sub>7</sub> P             | 452.2784 | 2.65  | 78.9574;140.0106;196.0373;214.0481;255.2327           | 17.81 | 1.57 |
| Glucaric acid          | C <sub>6</sub> H <sub>10</sub> O <sub>8</sub>                 | 209.0298 | 2.87  | 85.0279;111.0073;191.0194                             | 7.93  | 1.3  |
| Uridine                | C <sub>9</sub> H <sub>12</sub> N <sub>2</sub> O <sub>6</sub>  | 243.0623 | 4.53  | 66.0334;82.0283;110.0247;122.0234;152.0343;200.0559   | 9.2   | 0.65 |

**Table S10.** Pathway with PI greater than 0.1 analysis of the potential differential metabolite between before and after administration group

| Pathway Name                                | Total | Hits | P         | -log(p) | FDR        | Expected | Impact  |
|---------------------------------------------|-------|------|-----------|---------|------------|----------|---------|
| Aminoacyl-tRNA biosynthesis                 | 75    | 8    | 2.06E-06  | 13.095  | 0.00016447 | 0.93477  | 0.11268 |
| Arginine and proline metabolism             | 77    | 5    | 0.0022383 | 6.1021  | 0.059302   | 0.9597   | 0.19377 |
| Alanine, aspartate and glutamate metabolism | 24    | 3    | 0.0029651 | 5.8208  | 0.059302   | 0.29913  | 0.64863 |
| D-Glutamine and D-glutamate metabolism      | 11    | 2    | 0.0077044 | 4.866   | 0.12327    | 0.1371   | 0.13904 |
| Citrate cycle (TCA cycle)                   | 20    | 2    | 0.024828  | 3.6958  | 0.24828    | 0.24927  | 0.12153 |
| Tryptophan metabolism                       | 79    | 3    | 0.073214  | 2.6144  | 0.41836    | 0.98463  | 0.1773  |
| Glycerophospholipid metabolism              | 39    | 2    | 0.083742  | 2.48    | 0.44662    | 0.48608  | 0.10053 |
| Tyrosine metabolism                         | 76    | 2    | 0.24429   | 1.4094  | 0.88833    | 0.94724  | 0.10975 |
| Sphingolipid metabolism                     | 25    | 1    | 0.27031   | 1.3082  | 0.90103    | 0.31159  | 0.1402  |
